# Supplementary material
Source: PubMed Central journal article supplement (PMC3113239)
Supplement: mmc1.pdf [file mmc1.pdf]

**The American Journal of Human Genetics, Volume 88  
Supplemental Data**

**Mutations in *PRDM5* in Brittle Cornea Syndrome  
Identify a Pathway Regulating Extracellular  
Matrix Development and Maintenance**

**Emma M.M. Burkitt Wright, Helen L. Spencer, Sarah B. Daly, Forbes D.C. Manson, Leo A.H. Zeef, Jill Urquhart, Nicoletta Zoppi, Richard Bonshek, Ioannis Tosounidis, Meyyammai Mohan, Colm Madden, Annabel Dodds, Kate E Chandler, Siddharth Banka, Leon Au, Jill Clayton-Smith, Naz Khan, Leslie G Biesecker, Meredith Wilson, Marianne Rohrbach, Marina Colombi, Cecilia Giunta, and Graeme C.M. Black**

**Table S1. Primers for Amplification of Exons of *PRDM5***

| <b>Fragment</b>          | <b>Oligonucleotide</b>                                                  | <b>Size</b> |
|--------------------------|-------------------------------------------------------------------------|-------------|
| <i>PRDM5</i><br>exon 1   | Forward: accccaaatttcgatgtgc<br>Reverse: gtggcgcagcgagtaaag             | 363 bp      |
| <i>PRDM5</i><br>exon 2   | Forward: ggcataagatttgcagaaa<br>Reverse: gggcaacaagagcaaatctc           | 353 bp      |
| <i>PRDM5</i><br>exon 3   | Forward: gagaagaatgcatgttagtccaa<br>Reverse: ggaggtcattgggaaacaaa       | 373 bp      |
| <i>PRDM5</i><br>exon 4   | Forward: tttcatgcacacatagtactcca<br>Reverse: gaatgcatattacaaggcaac      | 377 bp      |
| <i>PRDM5</i><br>exon 5   | Forward: ttggtgaaatacaagtgattttgaa<br>Reverse: tggcaaattaataaatggacaaaa | 673 bp      |
| <i>PRDM5</i><br>exon 6/7 | Forward: aaggtactgctaaaaatttaaaaagg<br>Reverse: gagcgagaattaaaaacagatcg | 698 bp      |
| <i>PRDM5</i><br>exon 8   | Forward: tgaactacatatcacctcgaaaca<br>Reverse: aattgccattgattttcagatt    | 295 bp      |
| <i>PRDM5</i><br>exon 9   | Forward: tggcagctgttcacatgttt<br>Reverse: aggccctgattaccactct           | 273 bp      |
| <i>PRDM5</i><br>exon 10  | Forward: gaccatccttagtttcttaccg<br>Reverse: aggccccagatgtacaaaag        | 364 bp      |
| <i>PRDM5</i><br>exon 11  | Forward: tccaccttcccttcttct<br>Reverse: ataggcacacctctgggatg            | 298 bp      |
| <i>PRDM5</i><br>exon 12  | Forward: gccaacattttggagaaagc<br>Reverse: aaatcatgcatttgcattttga        | 389 bp      |
| <i>PRDM5</i><br>exon 13  | Forward: gccagtggaatatccatca<br>Reverse: aagagagagaaaacagccaaga         | 391 bp      |
| <i>PRDM5</i><br>exon 14  | Forward: gccaggatctgagtgtgtga<br>Reverse: caactccagtgattgccttt          | 283 bp      |
| <i>PRDM5</i><br>exon 15  | Forward: tcattcactggcaattttgg<br>Reverse: ggaagacactatgggggaaa          | 183 bp      |
| <i>PRDM5</i>             | Forward: tttctttgccaatagtgtgagtg                                        | 378 bp      |

|                                                           |                                  |  |
|-----------------------------------------------------------|----------------------------------|--|
| <i>exon 16</i>                                            | Reverse: ggcaaataagaactatgagacca |  |
| All primers amplified at an annealing temperature of 60°C |                                  |  |

**Table S2. Novel Sequence Variants in *PRDM5* Identified on Whole-Exome Sequencing**

| cDNA      | Protein prediction | Heterozygous individuals | Homozygous individuals | dbSNP accession number |
|-----------|--------------------|--------------------------|------------------------|------------------------|
| c.342A>C  | p.Glu114Asp        | 1                        | 0                      | ss410751661            |
| c.491A>T  | p.Lys164Ile        | 16                       | 1                      | ss410751662            |
| c.544C>T  | p.Leu182Phe        | 1                        | 0                      | ss410751663            |
| c.1066T>A | p.Ser356Thr        | 15                       | 0                      | ss410751664            |
| c.1102G>A | p.Val368Leu        | 1                        | 0                      | ss410751665            |
| c.1113C>A | p.Ser371Arg        | 2                        | 0                      | ss410751666            |
